# Supplementary material
Source: PubMed Central journal article supplement (PMC3831314)

**FIG.3**

**e**

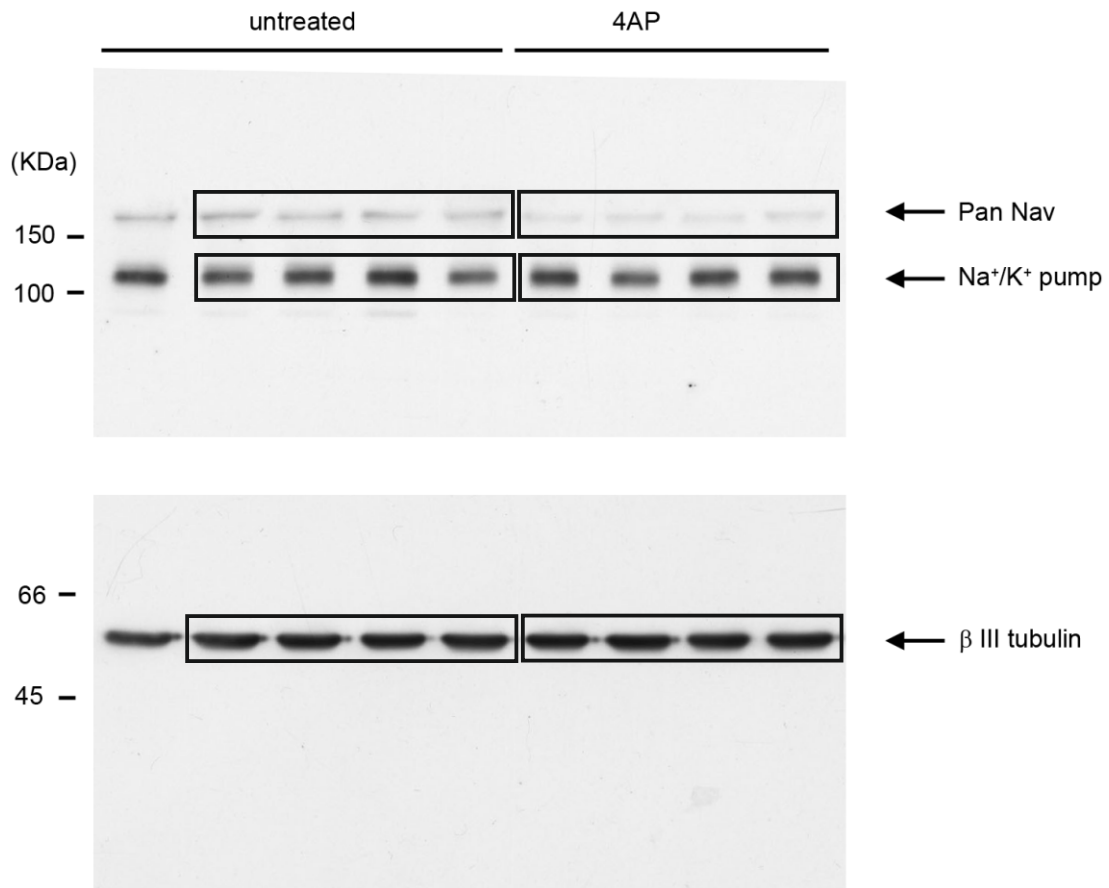

Supplement: emboj2013231df3e.pdf [file emboj2013231df3e.pdf]

**b**

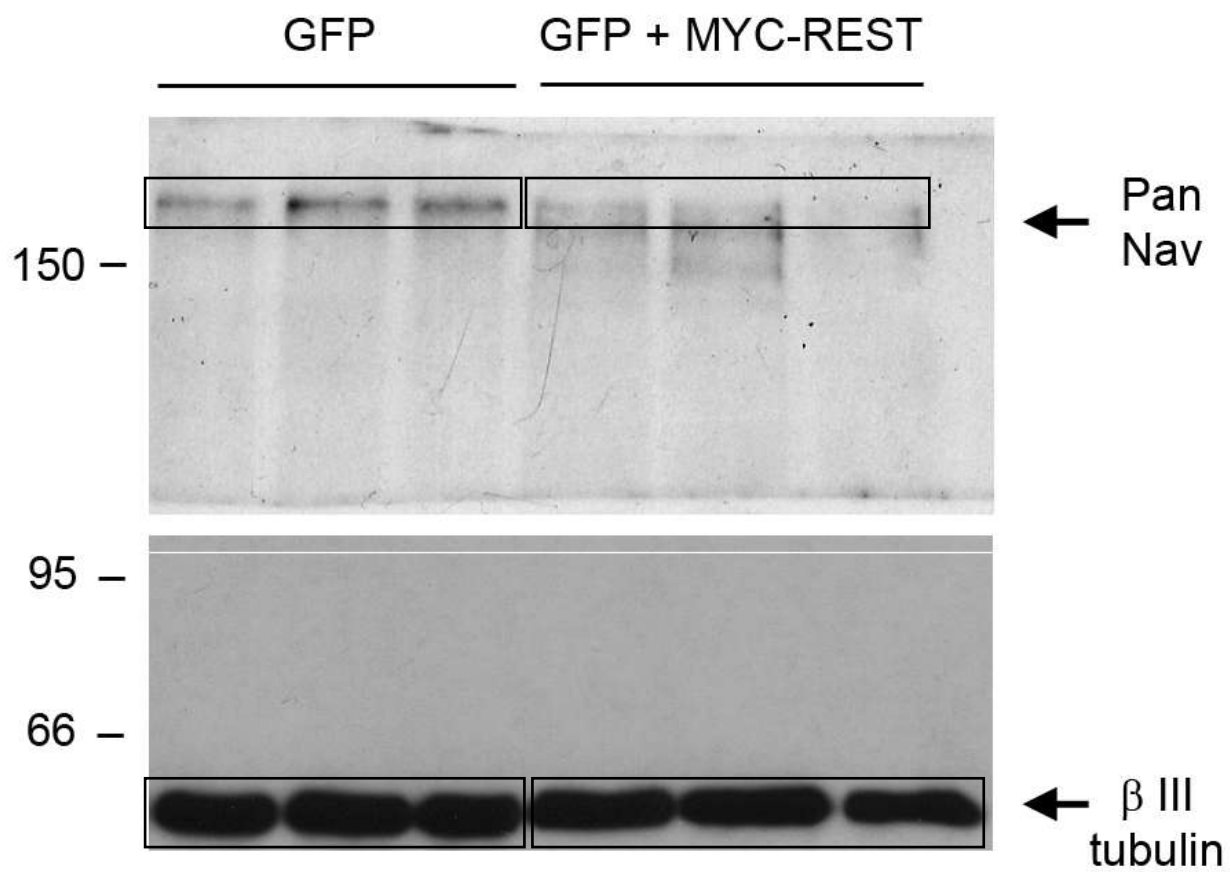

Supplement: emboj2013231df6b.pdf [file emboj2013231df6b.pdf]

# SUPPL FIG.7

a

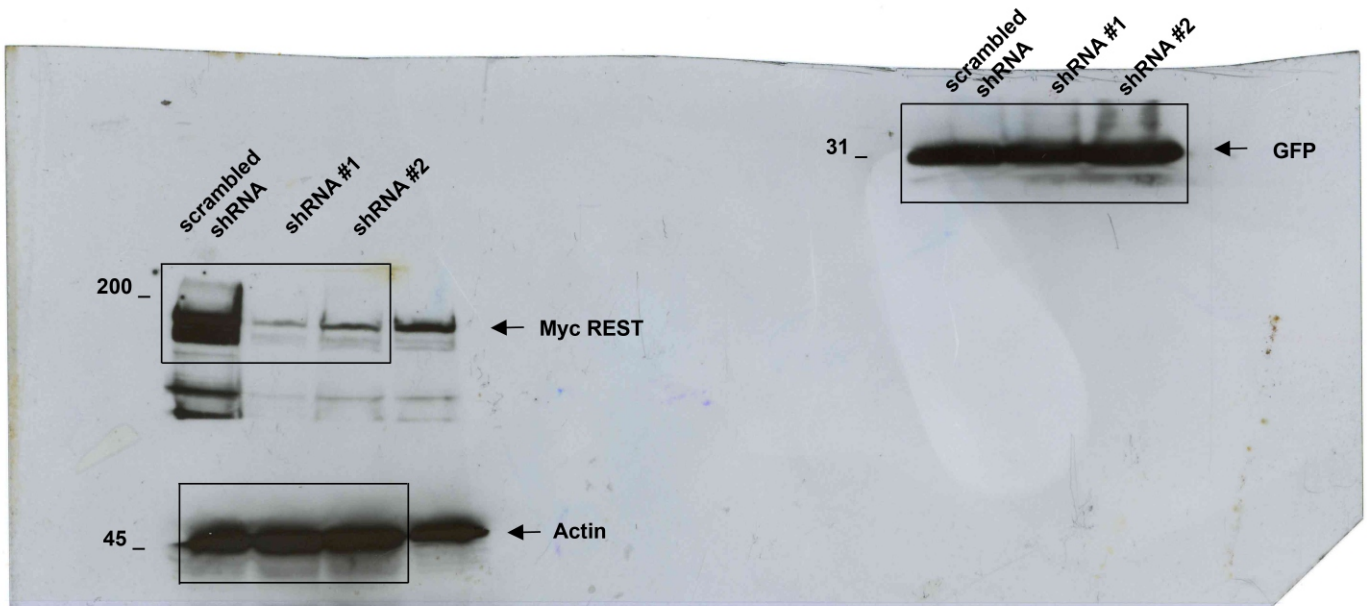

Supplement: emboj2013231df7a.pdf [file emboj2013231df7a.pdf]
